# Supplementary material for: Thermally Activated Delayed Fluorescence in Commercially Available Materials for Solution-Process Exciplex OLEDs
Source: MDPI journal article supplement (doi:10.3390/polym13101668), 2021-05-20
Supplement: s1 [file s1]

## **Supporting Information**

### **Thermally Activated Delayed Fluorescence in Commercially Available Materials for Solution-Process Exciplex OLEDs**

Zong-Liang Tseng<sup>1, 2,\*</sup>, Wei-Lun Huang<sup>1</sup>, You-Xun Xu<sup>1</sup>, Chih-Hsun Chiang<sup>1</sup>

<sup>1</sup>Department of Electronic Engineering and <sup>2</sup>Organic Electronics Research Center,  
Ming Chi University of Technology, New Taipei City 24301, Taiwan (R.O.C)

Corresponding authors' e-mail:

[zltseeng@mail.mcut.edu.tw](mailto:zltseeng@mail.mcut.edu.tw) (Z. L. Tseng)

Table S1. Average exciton lifetime of Investigated Exciplexes

| Exciplex       | $\tau_{av}$ (s)       |
|----------------|-----------------------|
| TAPC:POT2T     | $6.70 \times 10^{-7}$ |
| PVK:POT2T      | $6.10 \times 10^{-7}$ |
| NPB:POT2T      | $1.53 \times 10^{-7}$ |
| Poly-TPD:POT2T | $9.41 \times 10^{-8}$ |

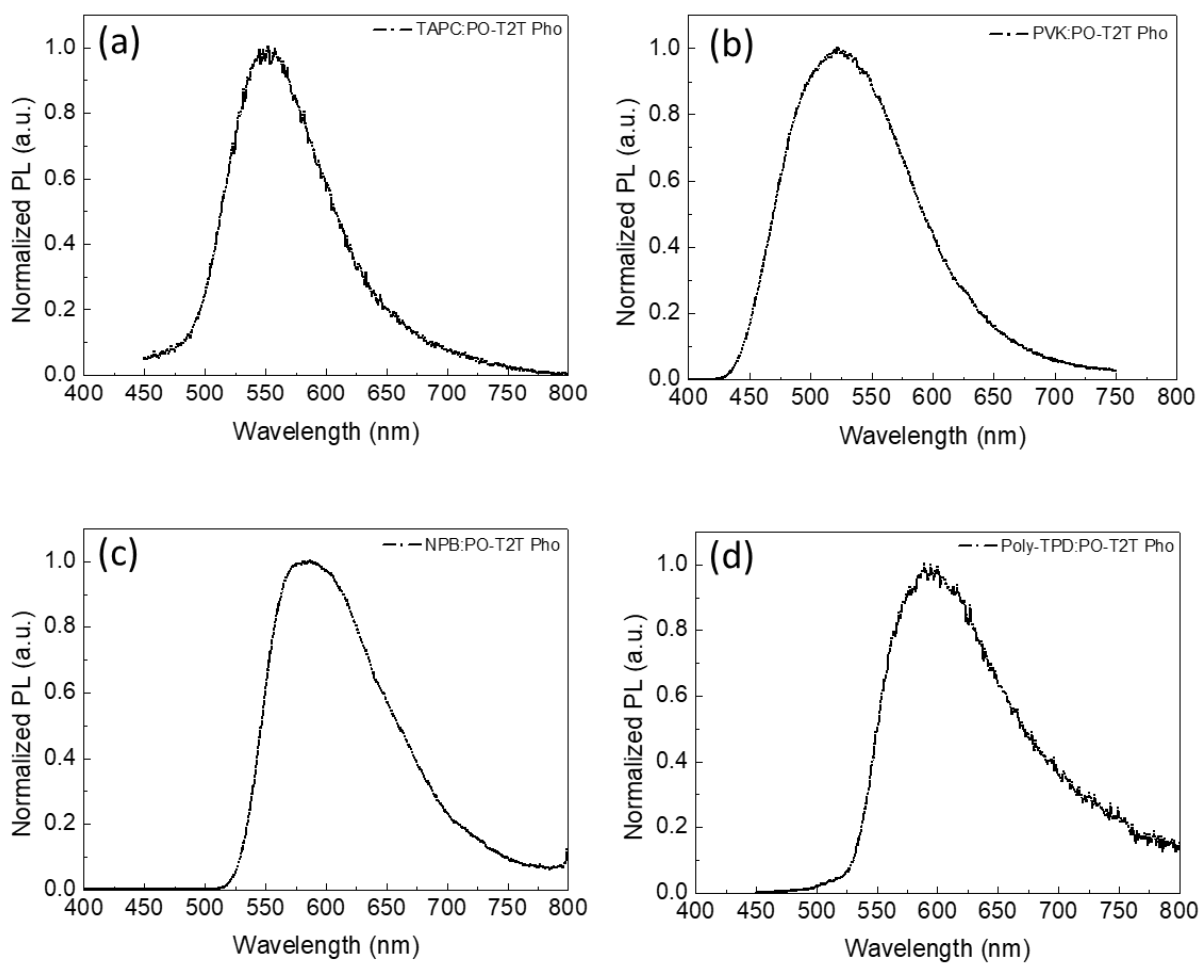

Figure S1. Phosphorescence spectrum of (a) TAPC:POT2T (b) PVK:POT2T (c) NPB:POT2T (d) Poly-TPD:POT2T at 77K.

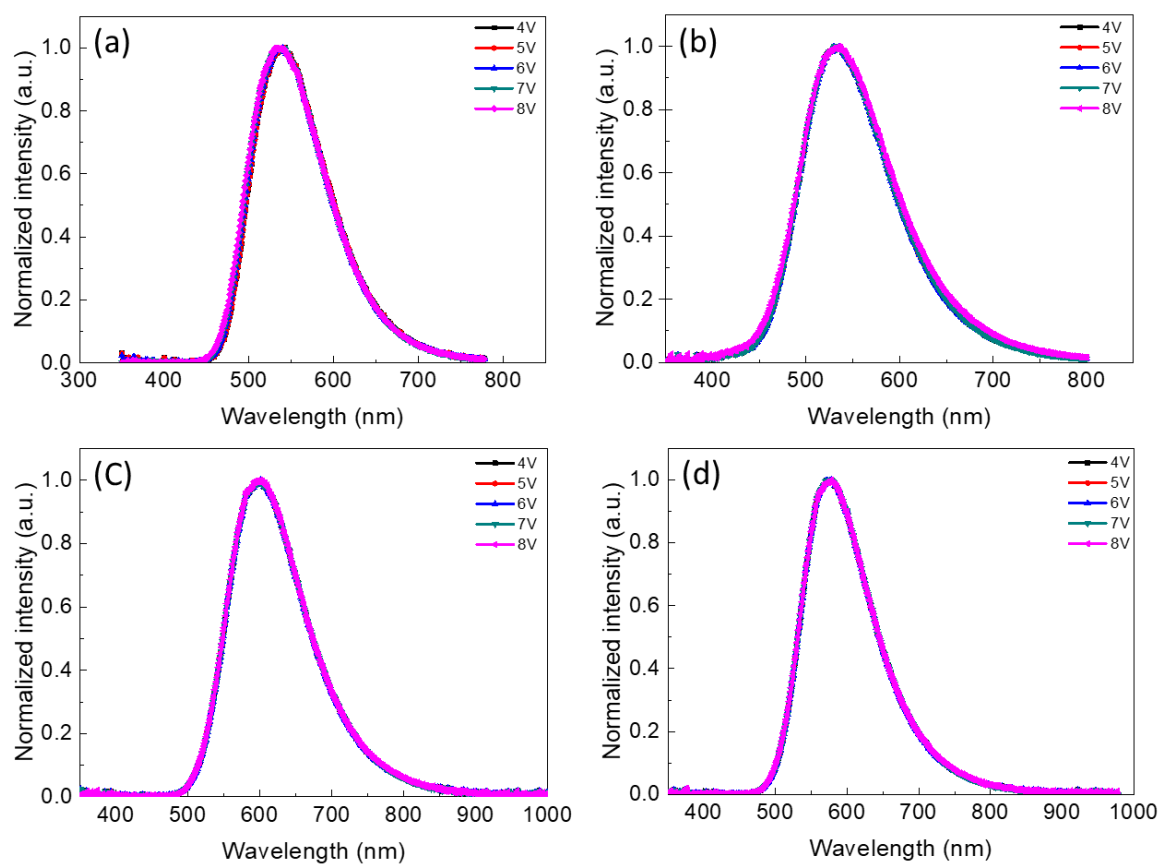

Figure S2. Electroluminescence spectra of fabricated devices at various driving voltages.; (a) TAPC:POT2T, (b) PVK :POT2T, (c) NPB:POT2T, (d) Poly-TPB:POT2T.
